# Supplementary material
Source: Research Square preprint supplement (doi:10.21203/rs.3.rs-9500973/v1)
Supplement: Supplementary file 1 [file c9902ca87c3ee059bc919a64.pdf]

# Supplementary Materials

## ARIA: Adaptive Reasoning for Integrated Analysis

**Table S1. Decision Log — Airway Benchmark**

| Step | Decision Point | Trigger                     | Action                             | Confidence |
|------|----------------|-----------------------------|------------------------------------|------------|
| 1    | DP1            | QC metrics: min 15.2M reads | PASS — all samples above threshold | 0.95       |
| 2    | DP3            | 4 cell lines × 2 conditions | Use paired model ~ cell + dex      | 0.90       |
| 3    | DP2            | 951 DEGs at  LFC  >1        | Standard strategy (ORA + GSEA)     | 0.95       |
| 4    | DP8            | Analysis complete           | Generate HTML report + figures     | 1.00       |

**Table S2. Decision Log — SEQC Benchmark**

| Step | Decision Point | Trigger                      | Action            | Confidence |
|------|----------------|------------------------------|-------------------|------------|
| 1    | DP1            | QC metrics: min 37.8M counts | PASS              | 0.95       |
| 2    | DP2            | 10,430 DEGs at  LFC  >1      | Standard strategy | 0.99       |

| Step | Decision Point | Trigger           | Action          | Confidence |
|------|----------------|-------------------|-----------------|------------|
|      |                |                   | (EASY case)     |            |
| 3    | DP8            | Analysis complete | Generate report | 1.00       |

**Table S3. Decision Log – Fmr1 KO Benchmark**

| Step | Decision Point | Trigger                      | Action                             | Confidence |
|------|----------------|------------------------------|------------------------------------|------------|
| 1    | DP1            | QC metrics: min 30.3M counts | PASS                               | 0.95       |
| 2    | DP2            | 398 DEGs at $ LFC  > 1$      | Standard strategy                  | 0.90       |
| 3    | DP5            | Primary DE complete          | Cross-validate: edgeR + limma-voom | 0.85       |
| 4    | DP8            | Analysis complete            | Generate report                    | 1.00       |

**Table S4. Decision Log – Pasilla Benchmark**

| Step | Decision Point | Trigger                        | Action                                               | Confidence |
|------|----------------|--------------------------------|------------------------------------------------------|------------|
| 1    | DP1            | QC metrics: min 8.4M counts    | PASS                                                 | 0.95       |
| 2    | DP3            | Mixed SE/PE libraries detected | Include library type as covariate ~ type + condition | 0.85       |
| 3    | DP2            | 224 DEGs at $ LFC  > 1$        | Standard strategy                                    | 0.90       |
| 4    | DP5            | Primary DE complete            | Cross-validate: edgeR + limma-voom (r=0.9906)        | 0.85       |

| <b>Step</b> | <b>Decision Point</b> | <b>Trigger</b>    | <b>Action</b>                                | <b>Confidence</b> |
|-------------|-----------------------|-------------------|----------------------------------------------|-------------------|
| 5           | DP7                   | Results available | Sensitivity analysis: 12 cutoff combinations | 0.90              |
| 6           | DP8                   | Analysis complete | Generate report                              | 1.00              |

**Table S5. Sensitivity Analysis – Pasilla**

| <b>padj cutoff</b> | <b>LFC cutoff</b> | <b>Number of DEGs</b> |
|--------------------|-------------------|-----------------------|
| 0.01               | 2.0               | ~50                   |
| 0.01               | 1.0               | ~150                  |
| 0.01               | 0.5               | ~400                  |
| 0.01               | 0.0               | ~700                  |
| 0.05               | 2.0               | ~80                   |
| 0.05               | 1.0               | 224                   |
| 0.05               | 0.5               | 635                   |
| 0.05               | 0.0               | 1,108                 |
| 0.10               | 2.0               | ~100                  |
| 0.10               | 1.0               | ~280                  |
| 0.10               | 0.5               | ~800                  |
| 0.10               | 0.0               | ~1,400                |

**Table S6. Known Target Gene Recovery**

**Airway – Dexamethasone targets (7/7 = 100%)**

| <b>Gene</b> | <b>Function</b>      | <b>log2FC</b> | <b>padj</b> | <b>Detected</b> |
|-------------|----------------------|---------------|-------------|-----------------|
| DUSP1       | MAPK phosphatase     | 2.94          | 1.3e-124    | Yes             |
| KLF15       | Transcription factor | 4.46          | 7.8e-78     | Yes             |
| CRISPLD2    | Anti-inflammatory    | 2.63          | 1.6e-45     | Yes             |
| PER1        | Circadian clock      | 3.19          | 1.9e-81     | Yes             |
| FKBP5       | GR co-chaperone      | 4.04          | 7.4e-26     | Yes             |
| TSC22D3     | Anti-inflammatory    | 3.19          | 3.2e-19     | Yes             |
| ZBTB16      | Transcription factor | 7.35          | 2.7e-40     | Yes             |

**SEQC – Brain markers in HBRR (9/9 = 100%)**

| <b>Gene</b> | <b>Function</b>  | <b>log2FC (B vs A)</b> | <b>Correct direction</b> | <b>Detected</b> |
|-------------|------------------|------------------------|--------------------------|-----------------|
| GFAP        | Astrocyte marker | +12.68                 | Yes (UP in brain)        | Yes             |
| MBP         | Oligodendrocyte  | +8.00                  | Yes                      | Yes             |
| SYN1        | Synaptic         | +7.54                  | Yes                      | Yes             |
| GAD1        | GABAergic        | +4.35                  | Yes                      | Yes             |
| SLC17A7     | Glutamatergic    | +8.14                  | Yes                      | Yes             |
| NEFL        | Neurofilament    | +7.20                  | Yes                      | Yes             |
| NEFM        | Neurofilament    | +8.14                  | Yes                      | Yes             |
| NEFH        | Neurofilament    | +3.78                  | Yes                      | Yes             |
| ENO2        | Neuron-specific  | +2.19                  | Yes                      | Yes             |

### **SEQC — Cancer markers in UHRR (6/7 = 86%)**

| <b>Gene</b> | <b>log2FC (B vs A)</b> | <b>Correct direction</b>    | <b>Detected</b> |
|-------------|------------------------|-----------------------------|-----------------|
| MYC         | -5.69                  | Yes (DOWN = UP in cancer)   | Yes             |
| CCND1       | -3.18                  | Yes                         | Yes             |
| CDK4        | -2.92                  | Yes                         | Yes             |
| EGFR        | -0.44                  | Yes                         | Yes             |
| ERBB2       | -1.90                  | Yes                         | Yes             |
| TP53        | -3.39                  | Yes                         | Yes             |
| BCL2        | +0.37                  | No (known brain expression) | Unexpected      |

### **Fmr1 KO — FMRP targets (9/11 detected)**

| <b>Gene</b> | <b>Function</b> | <b>log2FC</b> | <b>padj</b> | <b>Detected</b> |
|-------------|-----------------|---------------|-------------|-----------------|
| Fmr1        | KO target gene  | -0.983        | 3.7e-83     | Yes             |
| Map1b       | Microtubule     | -0.573        | 7.1e-79     | Yes             |
| Dlg4        | PSD-95          | -0.361        | 3.8e-22     | Yes             |
| Shank3      | PSD scaffold    | -0.454        | 2.3e-14     | Yes             |
| Camk2a      | Kinase          | -0.424        | 7.4e-18     | Yes             |
| Grin1       | NMDA-R          | -0.919        | 2.5e-81     | Yes             |
| Grin2a      | NMDA-R          | -0.812        | 1.1e-15     | Yes             |
| Grin2b      | NMDA-R          | -0.479        | 1.0e-30     | Yes             |
| Bdnf        | Neurotrophin    | -0.446        | 9.6e-03     | Yes             |

**Table S7. Cross-Method Concordance**

| <b>Benchmark</b> | <b>DESeq2<br/>DEGs</b> | <b>edgeR<br/>DEGs</b> | <b>limma<br/>DEGs</b> | <b>LFC r</b> |
|------------------|------------------------|-----------------------|-----------------------|--------------|
| SEQC             | 13,818                 | —                     | —                     | —            |
| Airway           | 2,426                  | —                     | —                     | —            |
| Fmr1 KO          | 1,654                  | ~1,600                | ~1,500                | 0.9999       |
| Pasilla          | 635                    | 739                   | 674                   | 0.9906       |

(DEG counts at  $\text{padj} < 0.05$ ,  $|\text{LFC}| > 0.5$ )

**Figure S1. PCA plots for all benchmarks**

Available in `benchmarks/results/[dataset]/DE/PCA.png`

**Figure S2. Volcano plots for all benchmarks**

Available in `benchmarks/results/[dataset]/DE/Volcano.png`

**Figure S3. GSEA barplots for all benchmarks**

Available in `benchmarks/results/[dataset]/GSEA/GSEA_*.png`

**Figure S4. Cross-method Venn diagrams**

Available in `benchmarks/results/[dataset]/method_comparison/Venn_methods.png`

---

**Software Versions**

| <b>Component</b> | <b>Version</b> |
|------------------|----------------|
| Python           | 3.10+          |
| R                | 4.4.1          |
| DESeq2           | 1.46.0         |
| edgeR            | 4.4.0          |
| limma            | 3.62.1         |
| fgsea            | 1.32.0         |
| msigdbr          | 2026.1         |
| EnhancedVolcano  | 1.24.0         |
| ggplot2          | 4.0.2          |
| Docker           | 24.0+          |

| <b>Component</b> | <b>Version</b> |
|------------------|----------------|
| ARIA             | 0.1.0          |
